# Supplementary material for: Effectiveness of Exercise in Patients with Overweight or Obesity Suffering from Knee Osteoarthritis: A Systematic Review and Meta-Analysis
Source: MDPI journal article supplement (doi:10.3390/ijerph191710510), 2022-08-24
Supplement: s1 [file s1]

1. PubMed

Field Tags: title & abstract

Date of Search: 2022-05-10

Publication years: 2002 to date

Number of Hits: 346

---

Search: **"knee osteoarthritis" AND exercise AND obesity**

"knee osteoarthritis"[All Fields] AND ("exercise"[MeSH Terms] OR "exercise"[All Fields] OR "exercises"[All Fields] OR "exercise therapy"[MeSH Terms] OR ("exercise"[All Fields] AND "therapy"[All Fields]) OR "exercise therapy"[All Fields] OR "exercise s"[All Fields] OR "exercised"[All Fields] OR "exerciser"[All Fields] OR "exercisers"[All Fields] OR "exercising"[All Fields]) AND ("obese"[All Fields] OR "obesity"[MeSH Terms] OR "obesity"[All Fields] OR "obese"[All Fields] OR "obesities"[All Fields] OR "obesity s"[All Fields])

**Translations**

**exercise:** "exercise"[MeSH Terms] OR "exercise"[All Fields] OR "exercises"[All Fields] OR "exercise therapy"[MeSH Terms] OR ("exercise"[All Fields] AND "therapy"[All Fields]) OR "exercise therapy"[All Fields] OR "exercise's"[All Fields] OR "exercised"[All Fields] OR "exerciser"[All Fields] OR "exercisers"[All Fields] OR "exercising"[All Fields]

**obesity:** "obese"[All Fields] OR "obesity"[MeSH Terms] OR "obesity"[All Fields] OR "obese"[All Fields] OR "obesities"[All Fields] OR "obesity's"[All Fields]

## 2. Web of Science

Field Tags: TOPIC

Date of Search: Date of Search: 2022-05-10

Publication years: 2002 to date

Number of Hits: 368

---

3

"knee osteoarthritis" AND exercise AND obesity (All Fields): 368

2

"Osteoarthritis knee" AND exercise AND obesity (All Fields): 4

1

"Osteoarthritis knee" AND "Exercise" AND "Obesity" (All Fields): 4

3. ScienceDirect (SCOPUS)

Field Tags: NO

Date of Search: Date of Search: 2022-05-10

Publication years: 2002 to date

Number of Hits: 458

---

TITLE-ABS-KEY ( "knee osteoarthritis" AND exercise AND obesity )
