# Supplementary material for: Effectiveness of Exercise in Patients with Overweight or Obesity Suffering from Knee Osteoarthritis: A Systematic Review and Meta-Analysis
Source: MDPI journal article supplement (doi:10.3390/ijerph191710510), 2022-08-24
Supplement: s1 [file s1]

Supplementary material File S3.

Sensitivity analysis

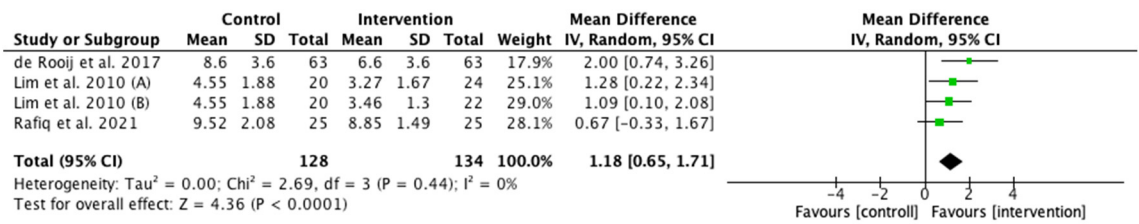

**Figure S1.** Sensitivity analysis excluding studies [26,29] comparing a 'diet and exercise' group versus a 'diet' group. Effects interventions on pain. CI, confidence interval.

Note: lower scores are indicating lower levels of pain.

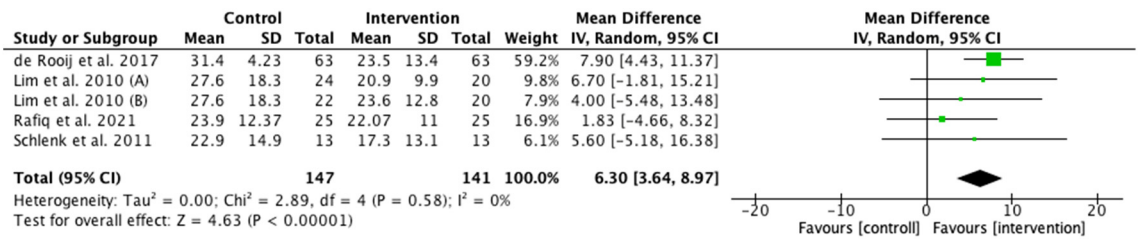

**Figure S2.** Sensitivity analysis excluding studies [26,29] comparing a 'diet and exercise' group versus a 'diet' group. Effects interventions on physical function. CI, confidence interval.

Note: lower scores indicating lower levels of symptoms or physical disability.

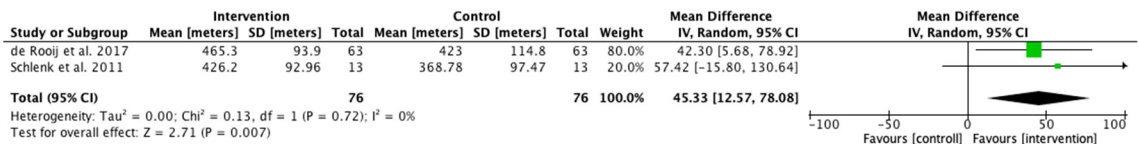

**Figure S3.** Sensitivity analysis excluding studies [26,29] comparing a 'diet and exercise' group versus a 'diet' group. Effects interventions on distance (meters) reached in the 6-minute test walk. CI, confidence interval.
